# Supplementary material for: Salvaging the Unsalvageable: Negative Pressure Wound Therapy for Severe Infection of Prosthetic Breast Reconstruction
Source: PubMed Central journal article supplement — Plast Reconstr Surg Glob Open. 2021 Mar 26;9(3):e3456. doi: 10.1097/GOX.0000000000003456 (PMC7997091; doi:10.1097/gox.0000000000003456), 2021-03-26
Supplement: gox-9-e3456-s001.pdf [file gox-9-e3456-s001.pdf]

## **Supplemental Digital Content 1: Implant Salvage Protocol – Outline<sup>15</sup>**

Antibiotic regimen determined in collaboration with Infectious Diseases Unit. Complete the following under general anaesthesia (or under sedation in sterile, operating theatre conditions):

### Explantation of the prosthesis after determination of severe peri-prosthetic infection

- 1) Breast pocket is opened and prosthesis removed
- 2) Thorough debridement to healthy tissue (including debridement of any non-integrated mesh)
- 3) Fluid and tissue samples from two different areas of the pocket are sent for MCS as well
- 4) Wash pocket with povidone-iodine and normal saline
- 5) Insert NPWTi dressing.

### Change of the NPWTi dressing at two to three-day intervals

- 1) Remove NPWTi dressing
- 2) Wash breast pocket and debride further if needed
- 3) Fluid and tissue samples from two different areas of the pocket are sent for MCS as well
- 4) Insert new NPWTi dressing

### Insertion of a new breast prosthesis

- 1) A new tissue expander or implant is inserted when:
  - a) At least one negative culture result has been obtained, and
  - b) Presence of healthy pink granulation tissue of the breast pocket.
- 2) If an expander is inserted, exchange of tissue expander to a permanent implant several months later.
